# Supplementary material
Source: PubMed Central journal article supplement (PMC5736100)

(A)

(B)

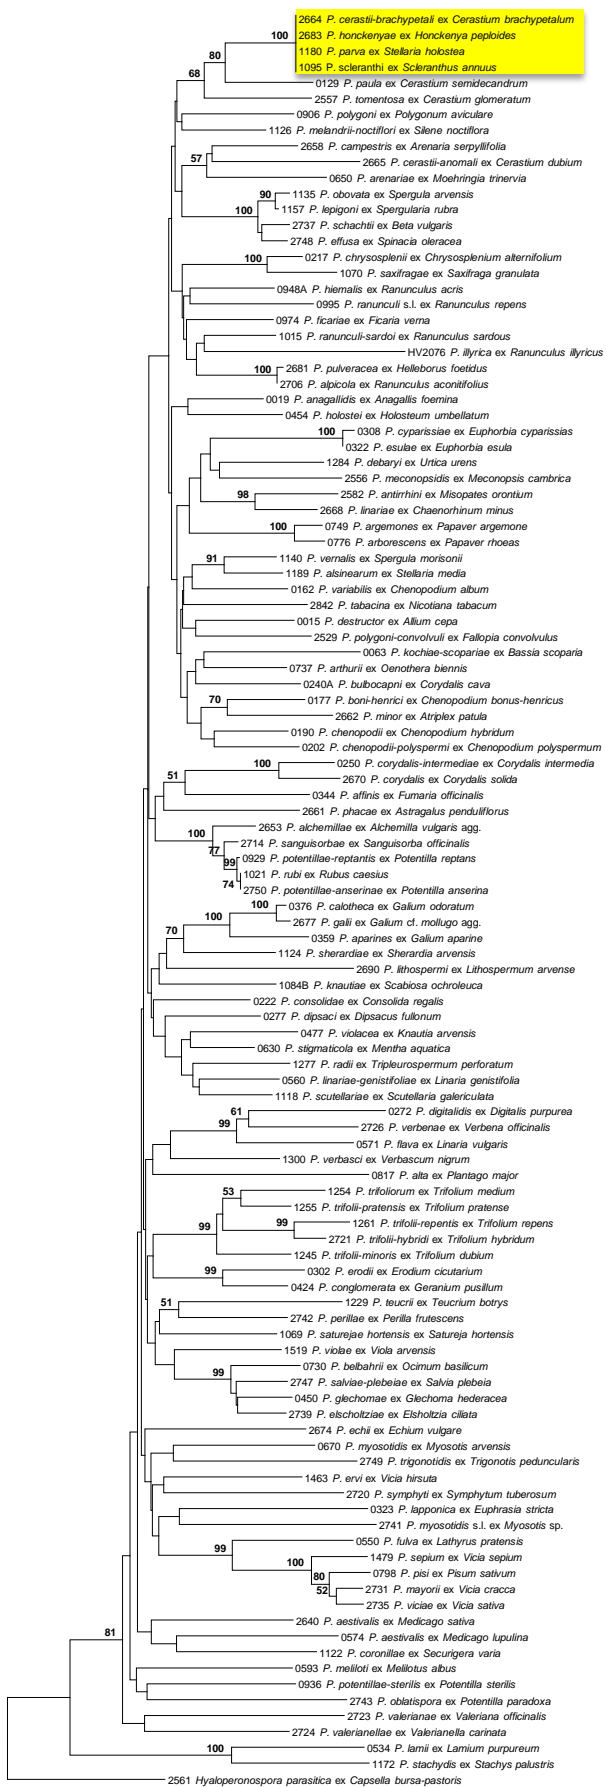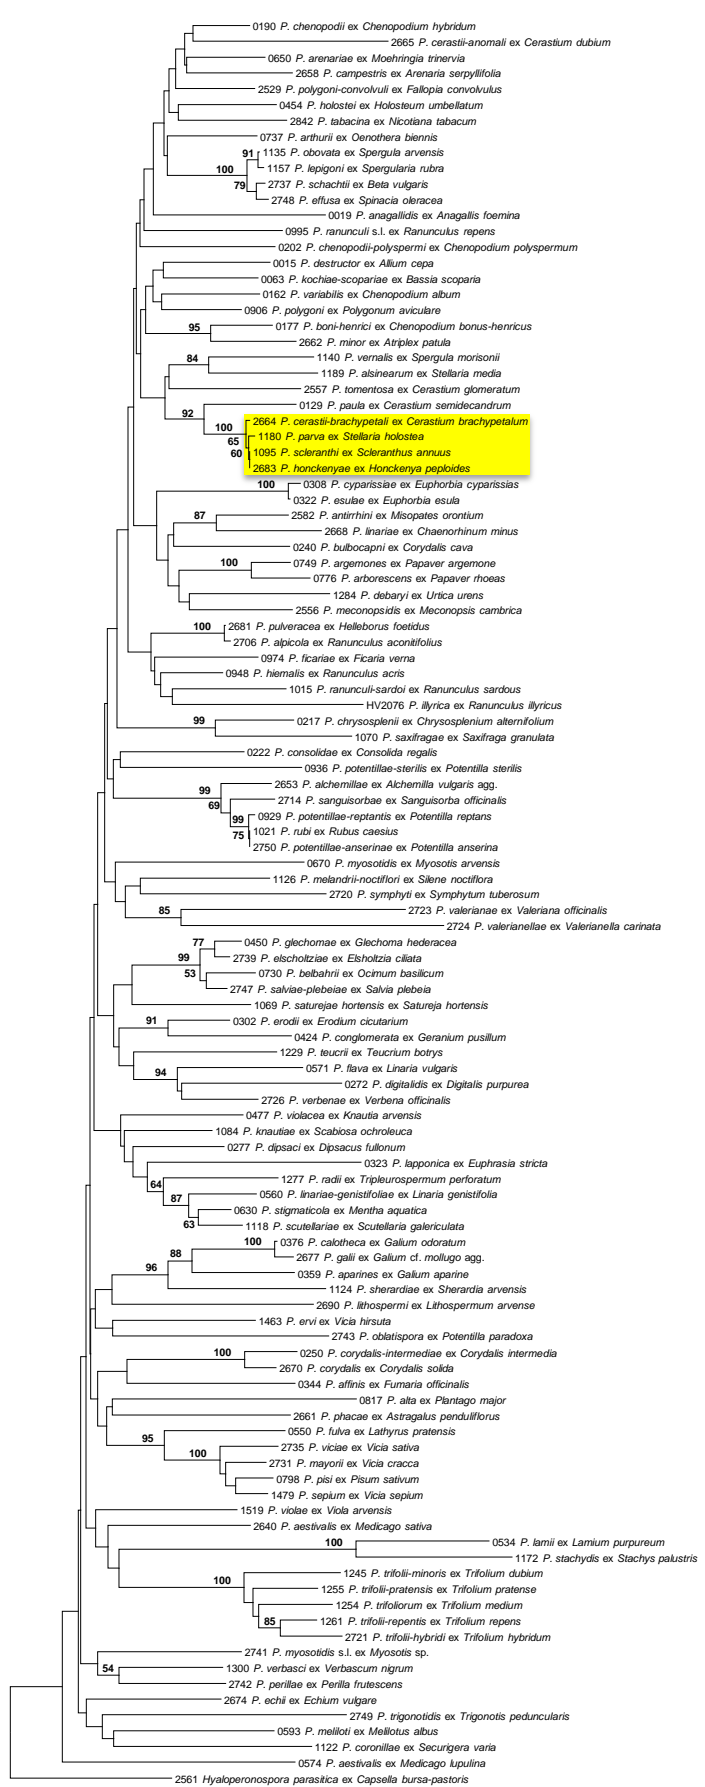

0.01

0.01

Supplement: NIHMS75343-supplement-Fig_S1.pdf [file NIHMS75343-supplement-Fig_S1.pdf]
